# Supplementary material for: Lamellar mesoporous carbon derived from bagasse for the cathode materials of lithium–sulfur batteries
Source: Royal Society of Chemistry journal article supplement (doi:10.1039/c6ra26531f), 2017-01-01
Supplement: c6ra26531f1.pdf [file c6ra26531f1.pdf]

## **Supporting Information**

### **Lamellar mesoporous carbon derived from bagasse for the cathode materials of lithium-sulfur batteries**

Xiqing Yuan<sup>1</sup>, Bingchuan Liu<sup>1</sup>, Jingyi Xu<sup>1</sup>, Xiaorong Yang<sup>1</sup>, Kemal Zeinu<sup>1</sup>, Xiulin He<sup>1</sup>, Longsheng Wu<sup>1</sup>, Jingping Hu<sup>1\*</sup>, Jiakuan Yang<sup>1\*</sup>, Jia Xie<sup>2</sup>

## Supplementary Figures

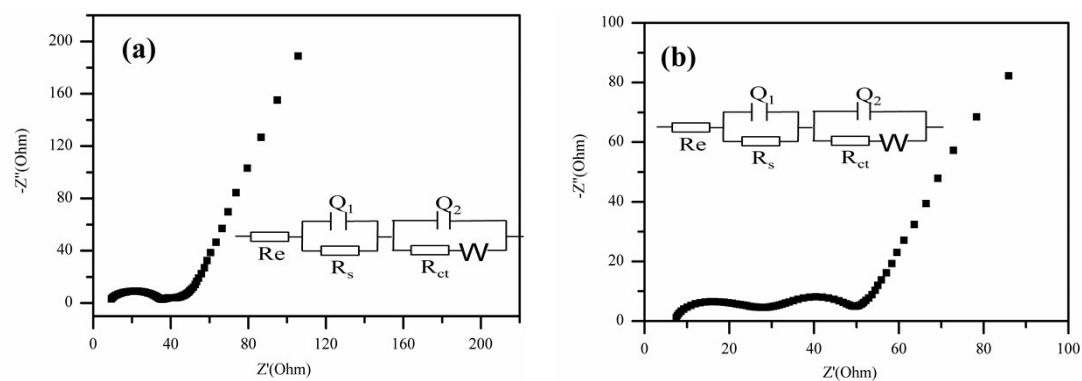

Fig. S1 Electrochemical impedance spectroscopy plots of the cathode (a) after 200 cycles in 0.1 C and (b) after rate cycles as shown in Fig 8. The dots represents experimental results from electrochemical impedance measurement and the an equivalent circuit for the fitting is shown in the insets.
